# Supplementary material for: Hesperetin, a Promising Dietary Supplement for Preventing the Development of Calcific Aortic Valve Disease
Source: MDPI journal article supplement (doi:10.3390/antiox11112093), 2022-10-24
Supplement: s1 [file s1]

# Hesperetin, a promising dietary supplement for preventing the development of calcific aortic valve disease

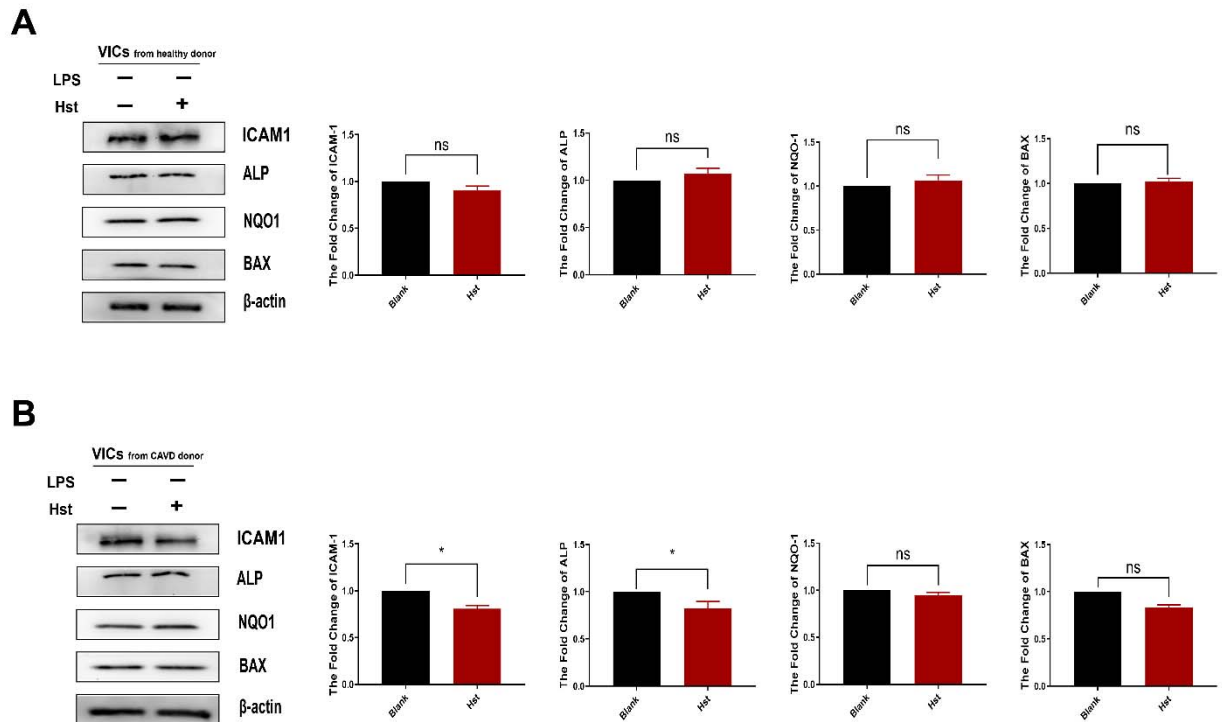

**Supplemental Figure S1. The effect of hesperetin was examined in healthy and CAVD donors.** (A) The expressions of ICAM-1, ALP, NQO-1 and BAX in healthy donors were detected by western blotting. n=3. (B) The expressions of ICAM-1, ALP, NQO-1 and BAX in CAVD donors were detected by western blotting. n= 3. \* Represents  $P < 0.05$ , \*\* represents  $P < 0.01$ , \*\*\* represents  $P < 0.001$ , \*\*\*\* represents  $P < 0.0001$  and n.s. represents  $P > 0.05$ .

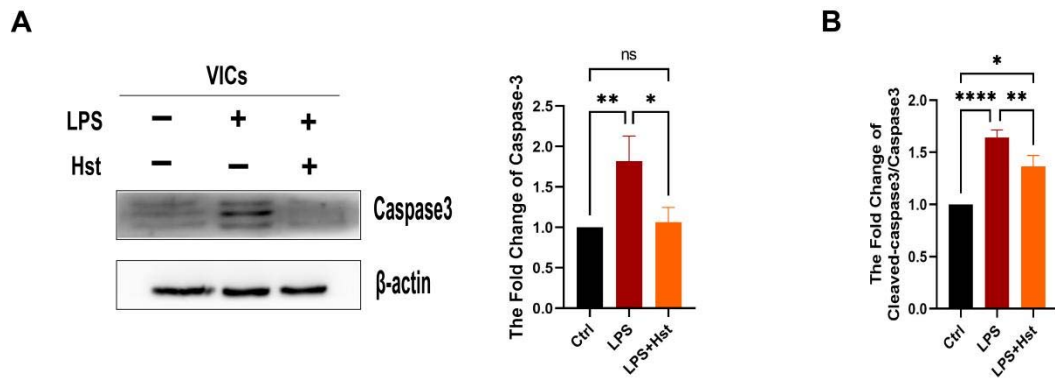

**Supplemental Figure S2. Hesperetin inhibited the apoptosis of VICs under LPS stimulation.** (A) The expressions of Caspase3 was detected by western blotting in each group. n= 3. (B) Calculated the ratio of Cleaved-caspase3 to caspase3. \* Represents  $P < 0.05$ , \*\* represents  $P < 0.01$ , \*\*\* represents  $P < 0.001$ , \*\*\*\* represents  $P < 0.0001$  and n.s. represents  $P > 0.05$ .

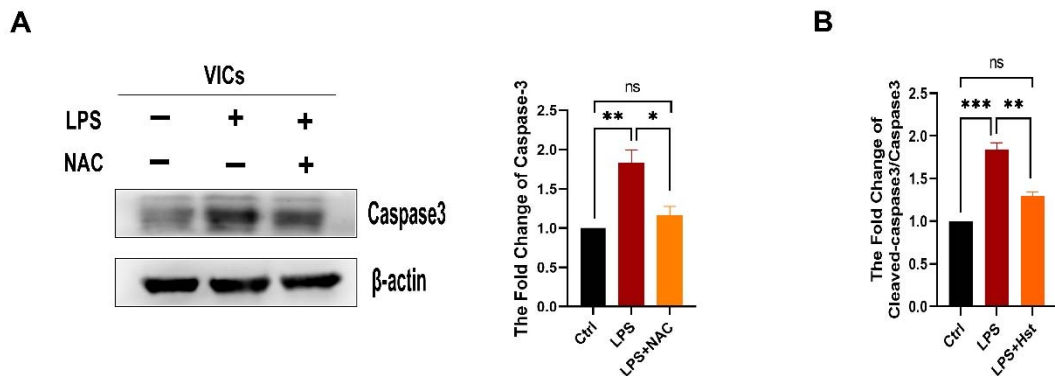

**Supplemental Figure S3. NAC inhibited the apoptosis of VICs under LPS stimulation.** (A) The expressions of Caspase3 was detected by western blotting in each group. n= 3. (B) Calculated the ratio of Cleaved-caspase3 to caspase3. \* Represents  $P < 0.05$ , \*\* represents  $P < 0.01$ , \*\*\* represents  $P < 0.001$ , \*\*\*\* represents  $P < 0.0001$  and n.s. represents  $P > 0.05$ .

**A**

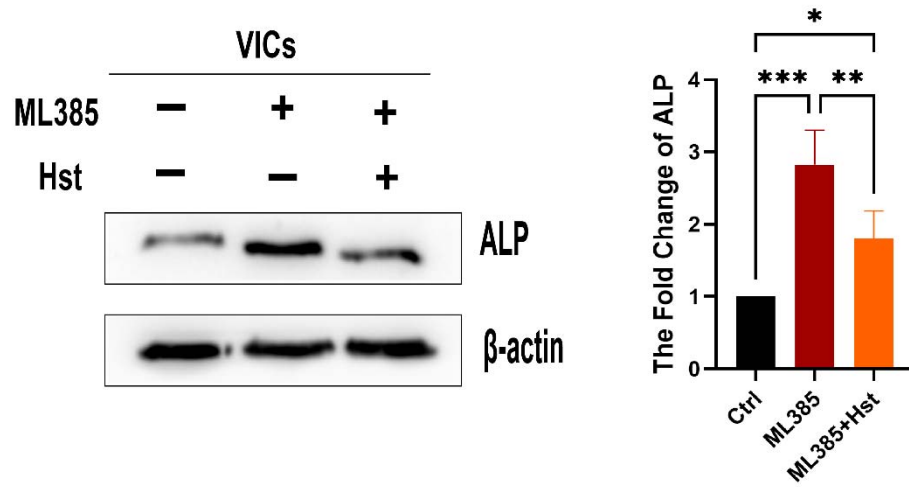

**Supplemental Figure S4. Hesperetin inhibited the osteogenic response of VICs under ML385 stimulation.** (A) The expressions of osteogenic protein (ALP) was detected by western blotting in each group. n= 3. \* Represents  $P < 0.05$ , \*\* represents  $P < 0.01$ , \*\*\* represents  $P < 0.001$ , \*\*\*\* represents  $P < 0.0001$  and n.s. represents  $P > 0.05$ .

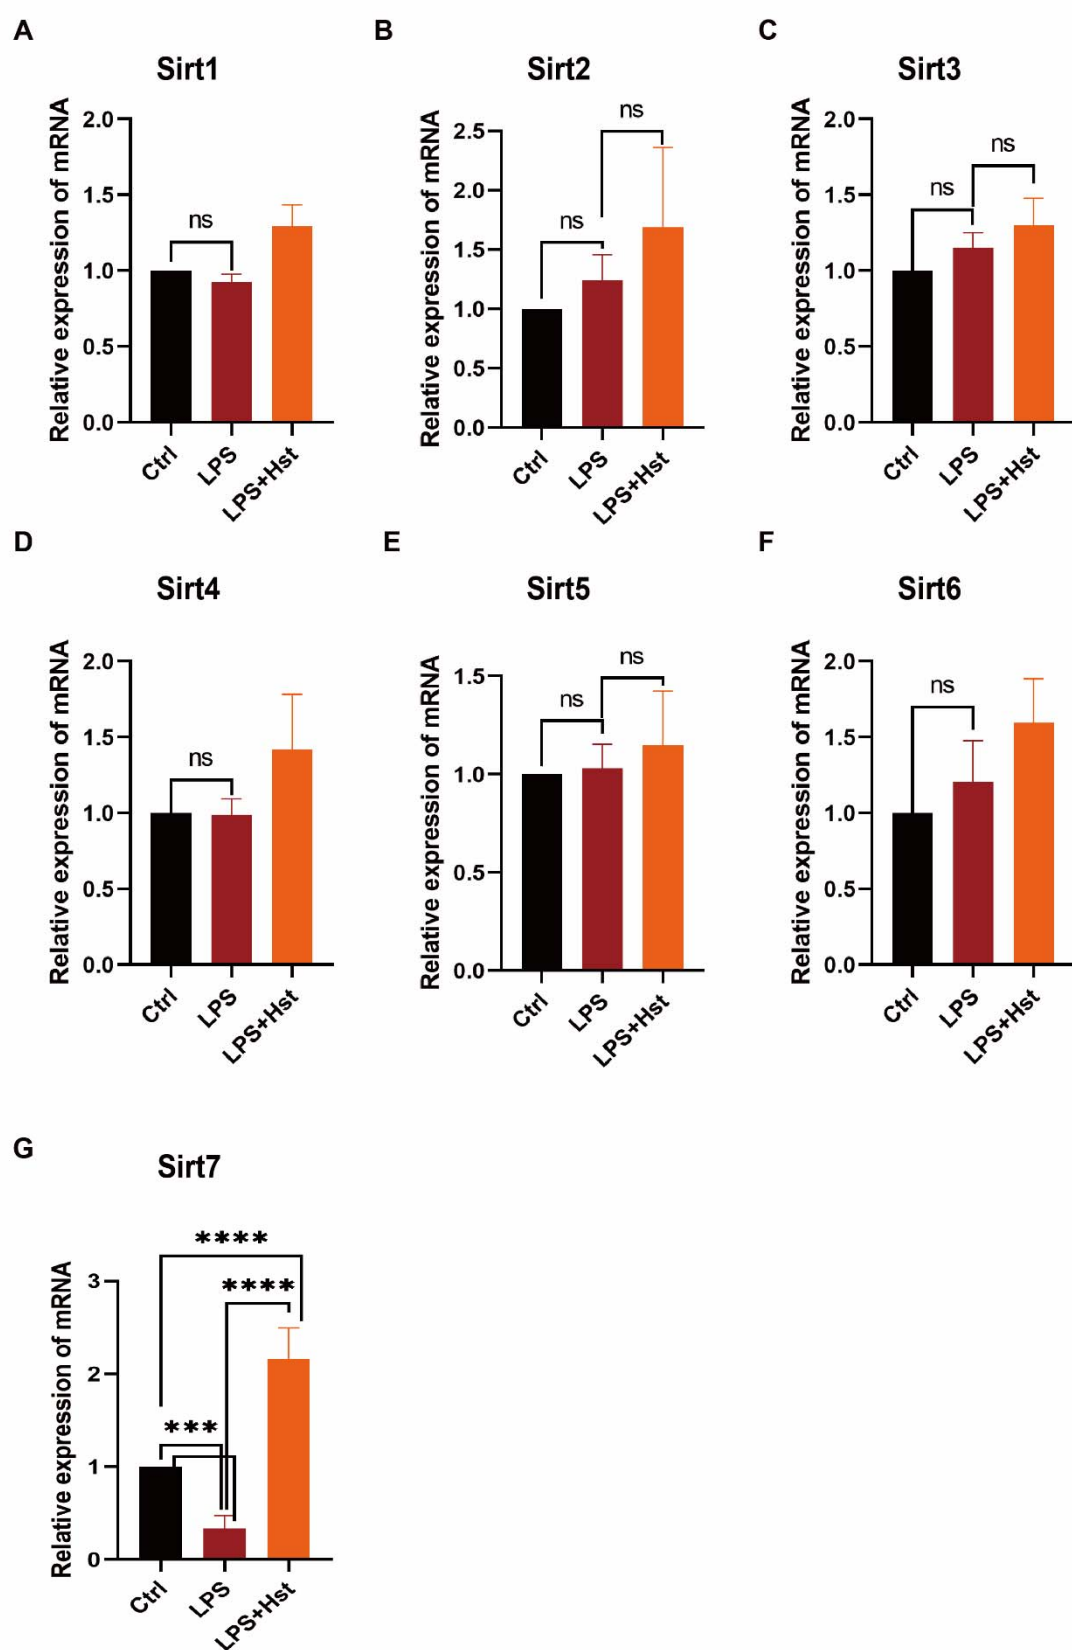

Supplemental Figure S5. Effects of hesperetin supplementation on sirtuin family

**mRNA levels under LPS stimulation.** (A-G) mRNA levels of sirtuin family members in human VICs under hesperetin supplementation for 24h. n= 5. \* Represents  $P < 0.05$ , \*\* represents  $P < 0.01$ , \*\*\* represents  $P < 0.001$ , \*\*\*\* represents  $P < 0.0001$  and n.s. represents  $P > 0.05$ .

**A**

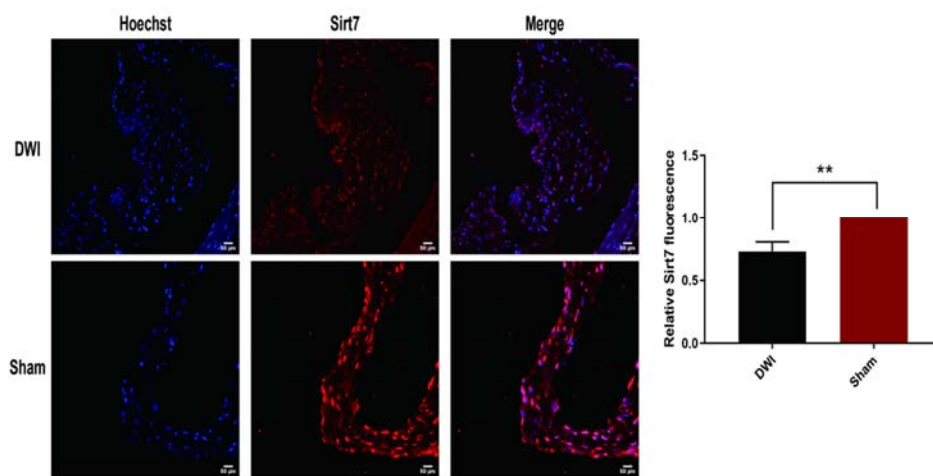

**Supplemental Figure S6. Sirt7 expression was decreased in DWI mice.** (A) The Sirt7 protein levels in mouse aortic valves were detected by immunofluorescence staining; Scale bar=50  $\mu$ m, n= 5. \* Represents  $P < 0.05$ , \*\* represents  $P < 0.01$ , \*\*\* represents  $P < 0.001$ , \*\*\*\* represents  $P < 0.0001$  and n.s. represents  $P > 0.05$ .

**A**

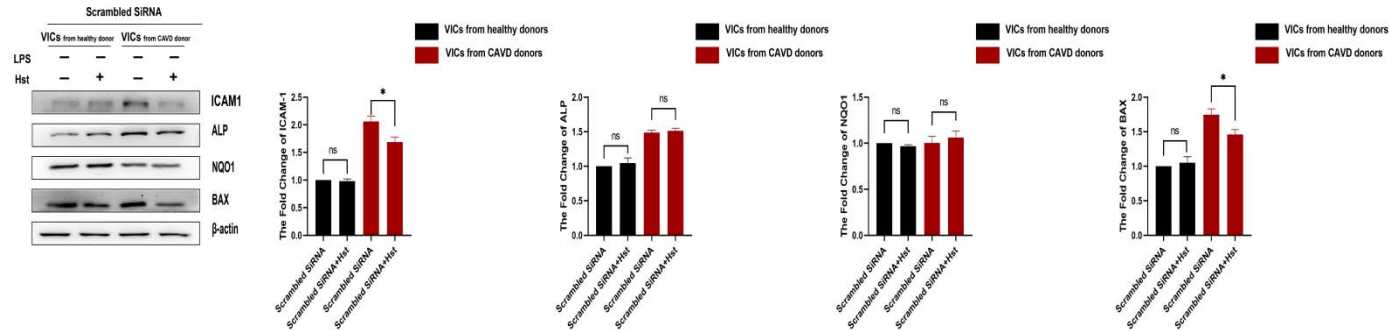

**B**

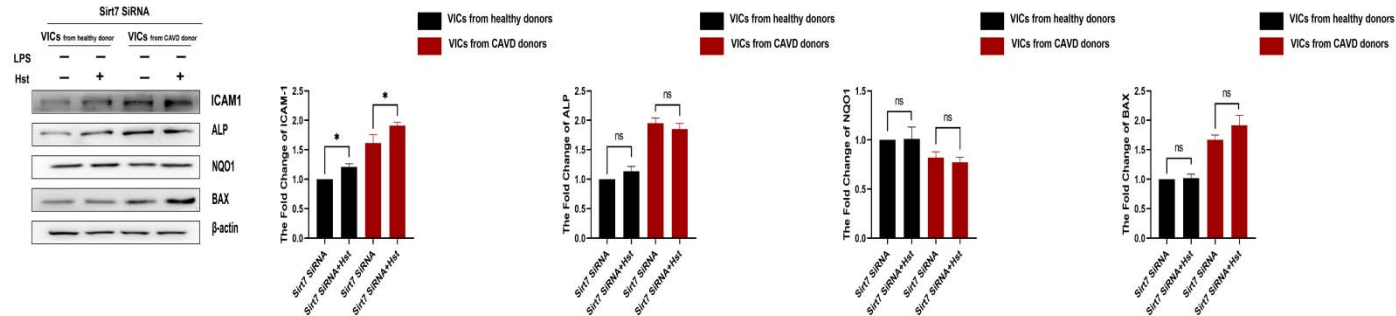

**Supplemental Figure S7. The effect of hesperetin treatment alone was examined with Scrambled siRNA or with Sirt7 siRNA. (A)** The expressions of ICAM-1, ALP, NQO-1 and BAX in Scrambled siRNA treatment were detected by western blotting. n= 3. **(B)** The expressions of ICAM-1, ALP, NQO-1 and BAX in Sirt7 siRNA treatment were detected by western blotting. n= 3. \* Represents  $P < 0.05$ , \*\* represents  $P < 0.01$ .

0.01, \*\*\* represents  $P < 0.001$ , \*\*\*\* represents  $P < 0.0001$  and n.s. represents  $P > 0.05$ .

**A**

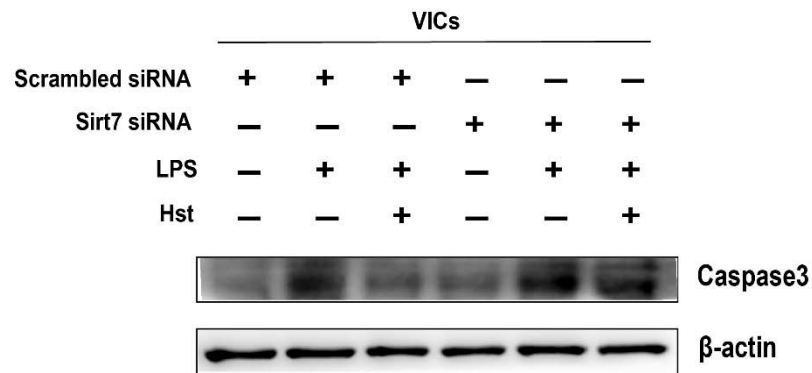

**B**

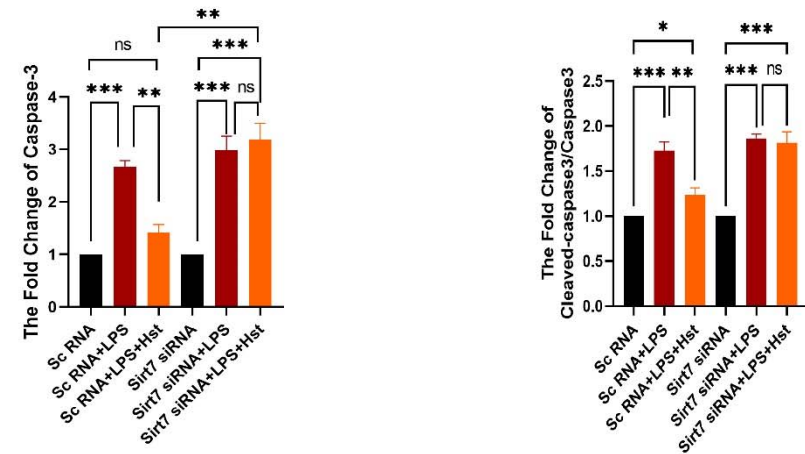

**Supplemental Figure S8. The inhibitory effect of hesperetin on the apoptosis of VICs was abolished after knockdown of Sirt7..** (A) The expressions of Caspase3 was detected by western blotting in each group.  $n = 3$ . (B) Calculated the ratio of Cleaved-caspase3 to caspase3. \* Represents  $P < 0.05$ , \*\* represents  $P < 0.01$ , \*\*\* represents  $P < 0.001$ , \*\*\*\* represents  $P < 0.0001$  and n.s. represents  $P > 0.05$ .

**A**

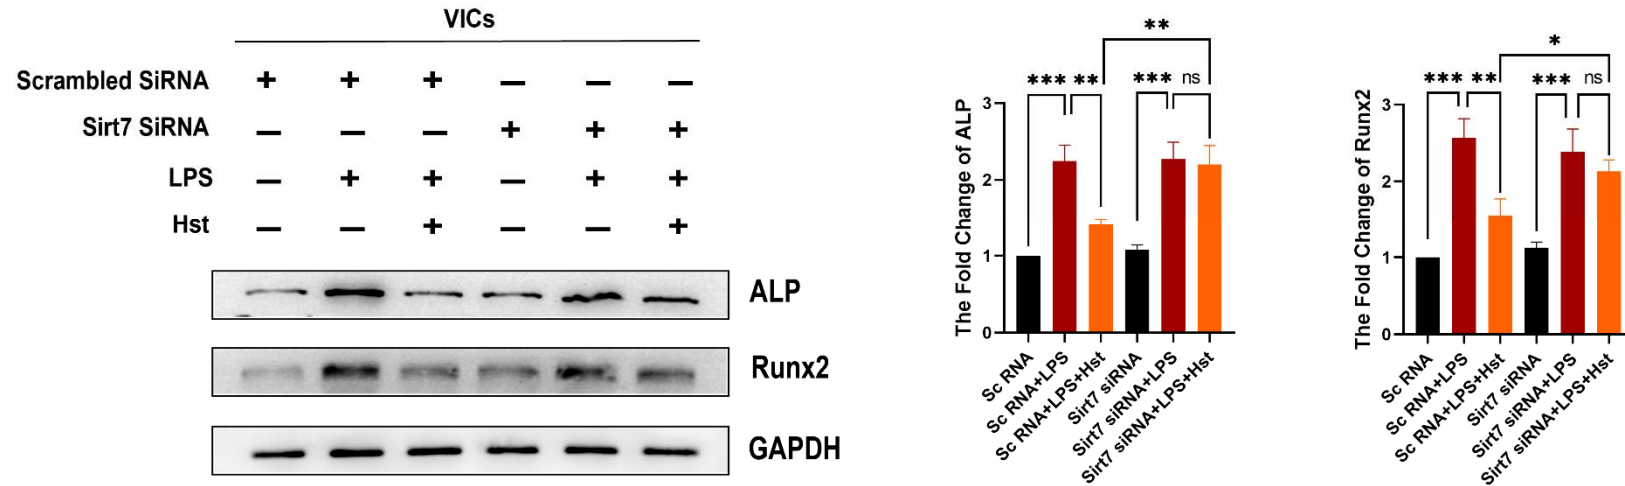

**Supplemental Figure S9. The inhibitory effect of hesperetin on the osteogenic response of VICs was abolished after knockdown of Sirt7.**

(A) The expressions of osteogenic proteins (ALP and Runx2) were detected by western blotting in each group. n= 3. \* Represents  $P < 0.05$ , \*\* represents  $P < 0.01$ , \*\*\* represents  $P < 0.001$ , \*\*\*\* represents  $P < 0.0001$  and n.s. represents  $P > 0.05$ .
